# Supplementary figures and images for: The Effect of Cross-Sex Fecal Microbiota Transplantation on Metabolism and Hormonal Status in Adult Rats
Source: MDPI journal article supplement (doi:10.3390/ijms25010601), 2024-01-02

# Corticosterone

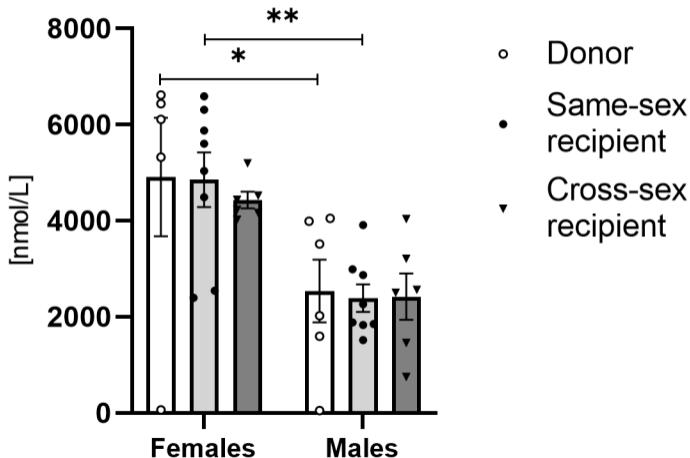

# RDA triplot – all recipients

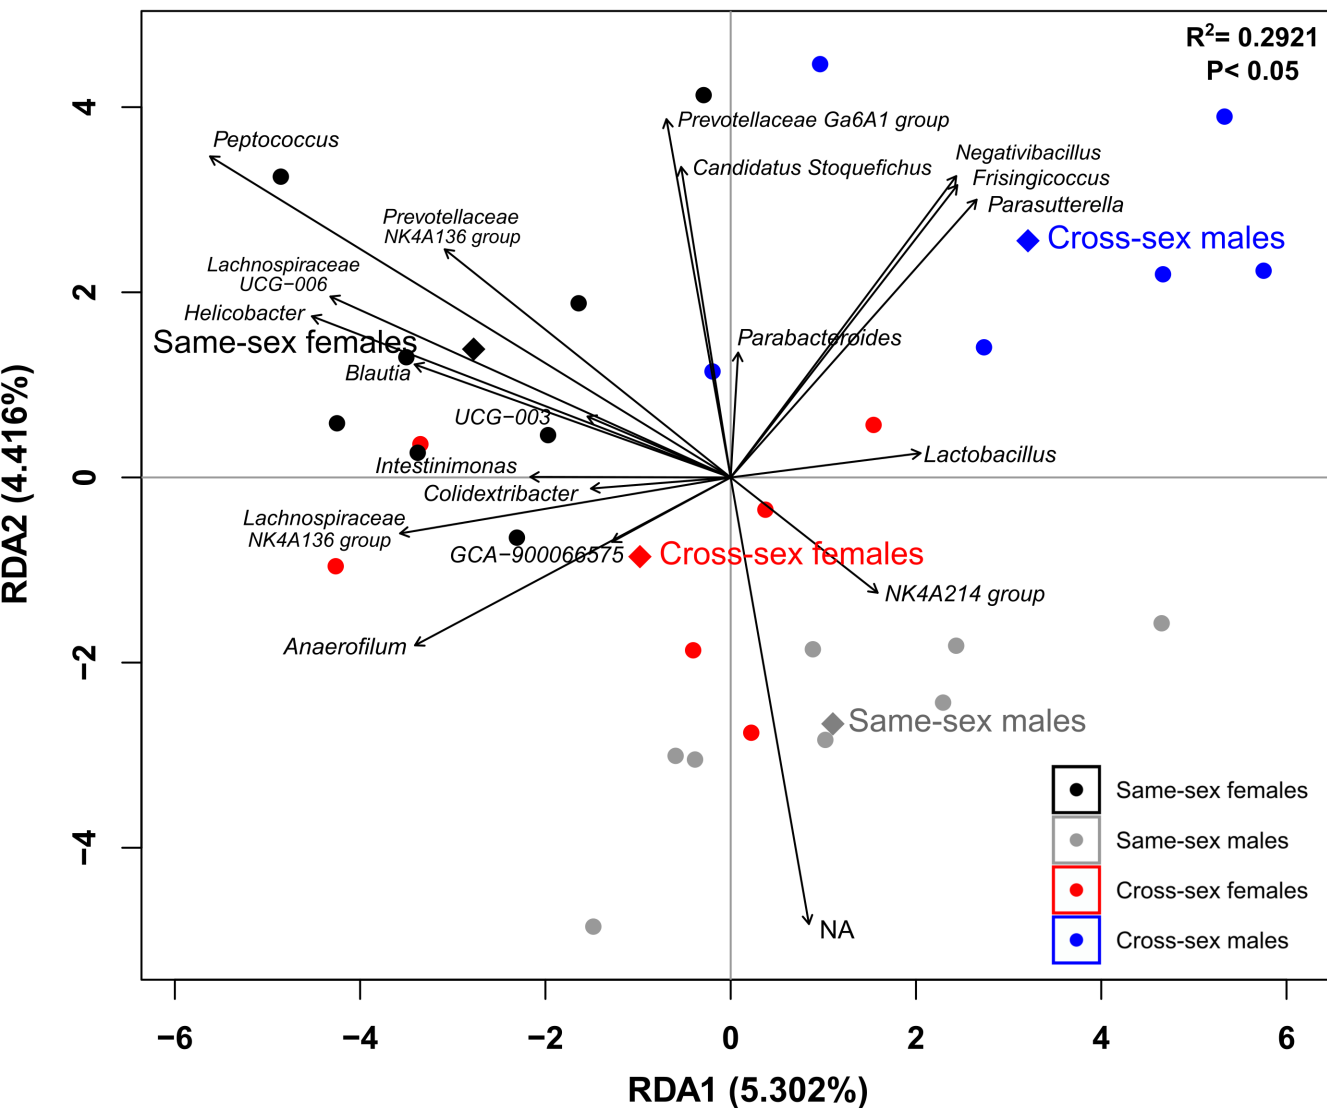

Supplement: s1 [file s1]
